# Supplementary material for: Clinical and virological features of chronic hepatitis B in the French national surveillance program, 2008–2012: A cross-sectional study
Source: PubMed Central journal article supplement — JHEP Rep. 2022 Sep 22;4(12):100593. doi: 10.1016/j.jhepr.2022.100593 (PMC9596732; doi:10.1016/j.jhepr.2022.100593), 2022-09-22
Supplement: mmc1.pdf [file mmc1.pdf]

# **Clinical and virological features of chronic hepatitis B in the French National Surveillance Program, 2008-2012**

Stéphane Chevaliez, Françoise Roudot-Thoraval, Cécile Brouard, Emmanuel  
Gordien, Fabien Zoulim, Ségolène Brichler, Véronique Brodard, Corinne Pioche,  
Jean-Michel Pawlotsky, Vincent Leroy, and the Hepatology Reference Centers and  
Laboratories Network for Chronic Hepatitis B Surveillance

## Table of contents

|                                                                                                            |   |
|------------------------------------------------------------------------------------------------------------|---|
| Table S1.....                                                                                              | 2 |
| Table S2.....                                                                                              | 3 |
| Table S3.....                                                                                              | 4 |
| List of Hepatology Reference Centers and Laboratories Network for Chronic Hepatitis<br>B Surveillance..... | 5 |

**Table S1:** Eligibility criteria for antiviral treatment according to EASL 2017 guidelines

| <b>HBeAg status</b>  | <b>HBV DNA (IU/mL)</b> | <b>ALT</b> | <b>Necro-inflammation or fibrosis</b> | <b>Other</b>  |
|----------------------|------------------------|------------|---------------------------------------|---------------|
| Negative or positive | >2000                  | >1xULN     | ≥A2 or ≥F2                            |               |
| Negative or positive | >20,000                | >2xULN     |                                       |               |
| Negative or positive | detectable             |            | ≥F4                                   |               |
| Positive             | >20,000                |            |                                       | Age >30 years |

**Table S2:** Baseline characteristics of patients with (n=33) and without (n=501) delta infection

|                                           | HDV+ve        | HDV-ve        | P value*    |
|-------------------------------------------|---------------|---------------|-------------|
| Age, years (median [IQR])                 | 43 [32-52.5]  | 37 [29-50]    | $p < 0.001$ |
| Sex, male [n (%)]                         | 26 (78.8)     | 299 (59.7)    | $p < 0.001$ |
| Detectable HBV DNA [n (%)]                | 20 (60.6)     | 440 (87.9)    | $p < 0.001$ |
| HBV DNA level (Log IU/mL), (median [IQR]) | 2.7 [1.8-4.0] | 3.3 [2.5-4.5] | $p = 0.004$ |
| HBsAg level (Log IU/mL), (median [IQR])   | 3.3 [1.2-3.9] | 3.6 [3.0-4.1] | $p = 0.034$ |
| HBV genotype [n (%)]                      |               |               |             |
| A                                         | 3 (16.7)      | 100 (20.0)    |             |
| B/C                                       | 1 (5.6)       | 47 (9.4)      |             |
| D                                         | 9 (50.0)      | 136 (27.2)    | $p = 0.021$ |
| E                                         | 5 (27.8)      | 107 (21.4)    |             |
| Significant fibrosis ( $\geq$ F2) [n (%)] | 13 (54.2)     | 44 (8.8)      | $p = 0.003$ |
| ALT >40 U/L [n (%)]                       | 17 (56.7)     | 173 (34.5)    | $p < 0.001$ |

\*Based on Kruskal-Wallis test was used when categorical variables had more than 2 classes and the correction of Bonferroni was used for multiple comparisons

**Table S3:** Baseline characteristics of patients with (n=360) and without (n=99) fibrosis stage assessment

|                                           | With          | Without       | P value*    |
|-------------------------------------------|---------------|---------------|-------------|
| Age, years (median [IQR])                 | 36 [28-49]    | 40 [29-53]    | $p = 0.064$ |
| Sex, male [n (%)]                         | 224 (62.2)    | 51 (51.5)     | $p = 0.127$ |
| BMI (kg/m <sup>2</sup> ), (median [IQR])  | 24 [22-27]    | 26 [22-30]    | $p = 0.095$ |
| History of alcohol abuse [n (%)]          | 14 (4.3)      | 7 (8.5)       | $p = 0.159$ |
| History of intravenous drug use [n (%)]   | 1 (0.3)       | 2 (3.0)       | $p = 0.081$ |
| Country of birth [n (%)]                  |               |               |             |
| France                                    | 81 (81.8)     | 18 (18.2)     |             |
| Europe, excluding France                  | 35 (72.9)     | 13 (27.1)     |             |
| North Africa                              | 30 (88.2)     | 4 (11.8)      |             |
| Middle-East                               | 11 (52.4)     | 10 (47.6)     | $p = 0.002$ |
| Asia                                      | 43 (87.8)     | 6 (12.2)      |             |
| West Indies                               | 13 (48.1)     | 14 (51.9)     |             |
| Sub-Saharan Africa                        | 144 (82.8)    | 30 (17.2)     |             |
| HBV DNA level (Log IU/mL), (median [IQR]) | 3.4 [2.5-4.6] | 3.2 [2.3-4.0] | $p = 0.038$ |
| HBsAg level (Log IU/mL), (median [IQR])   | 3.7 [3.0-4.1] | 3.7 [3.0-4.0] | $p = 0.492$ |
| ALT level (U/L) (median [IQR])            | 32 [21-50]    | 33 [24-46]    | $p = 0.674$ |
| ALT >40 U/L [n (%)]                       | 113 (32.3)    | 20 (22.7)     | $p = 0.092$ |

\*Based on Kruskal-Wallis test was used when categorical variables had more than 2 classes and the correction of Bonferroni was used for multiple comparisons

List of Hepatology Reference Centers and Laboratories Network for Chronic Hepatitis B Surveillance:

Prof. M Doffoël, Dr. A Edouard, Dr. E Saillard, Prof. P Couzigou, Prof. V de Ledinghen, Prof. P Hillon, Prof. D Guyader, Prof. EH Metman, Prof. Y Bacq, Dr. X Causse, Prof. G Thieffin, Prof. V di Martino, Prof. JP Miguet, Prof. T Dao, Prof. E Lerebourg, Prof. D Valla, Prof. P Marcellin, Prof. R Poupon, Prof. A Mallat, Prof. S Pol, Prof. D Larrey, Dr. A-J Remy, Prof. B Pillegrand, Prof. D Sautereau, Prof. JJ Raabe, Prof. J-P Bronowicki, Prof. JP Vinel, Prof. Cortot, Prof. P Calès, Prof. JL Dupas, Prof. M Moricheau-Beauchant, Prof. Botta-Fridlund, Prof. A Tran, Prof. F Zoulim, Prof. J-P Zarski, Prof. V Leroy, Prof. M Beaugrand, Prof. D Roulot, Prof. D Samuel.

Dr. E Schvoerer, Dr. F Najioullah, Dr. P Trimoulet, Dr. J-B Bour, Dr. S Minjolle, Prof. C Gaudy-Graffin, Dr. M Macé, Dr. V Brodard, Dr. D Bettinger, Dr. J Petitjean, Prof. J-C Plantier, Dr. M Martinot, Dr. J Gozlan, Dr. J-F Méritet, Dr. J Ducos, Dr. S Gaba, Prof. S Alain, Dr. Delamare, Dr. V Venard, Dr. F Abravanel, Dr. L Bocket, Prof. F Lunel, Prof. G Duverlie, Dr. A Bourgoin, Dr. P Colson, Dr. L Ollier, Dr. P Chevalier-Queyron, Dr. S Larrat, Dr. S Brichler, Dr. E Gordien, Prof. A-M Roque-Afonso, Prof. S Chevaliez.
